# Supplementary material for: Dark-Chocolate-Coated BRS Clara Raisins: Phenolic Composition and Sensory Attributes
Source: MDPI journal article supplement (doi:10.3390/molecules28207006), 2023-10-10
Supplement: s1 [file s1]

Table S1–Pearson Correlation between the sensory descriptors and the acceptance of DG

|     | BC     | OP     | IR      | DCO            | MCO            | FO      | SW      | ST     | BT      | DCF            | MCF     | RF     | FT             | SF             | AD     | T              | P              | N             | INT            | D              | ACT |
|-----|--------|--------|---------|----------------|----------------|---------|---------|--------|---------|----------------|---------|--------|----------------|----------------|--------|----------------|----------------|---------------|----------------|----------------|-----|
| BC  | 1      |        |         |                |                |         |         |        |         |                |         |        |                |                |        |                |                |               |                |                |     |
| OP  | 0.071  | 1      |         |                |                |         |         |        |         |                |         |        |                |                |        |                |                |               |                |                |     |
| IR  | -0.212 | 0.206  | 1       |                |                |         |         |        |         |                |         |        |                |                |        |                |                |               |                |                |     |
| DCO | 0.353* | 0.223  | 0.116   | 1              |                |         |         |        |         |                |         |        |                |                |        |                |                |               |                |                |     |
| MCO | -0.072 | -0.022 | 0.356*  | -0.192         | 1              |         |         |        |         |                |         |        |                |                |        |                |                |               |                |                |     |
| FO  | -0.171 | -0.204 | 0.193   | <b>-0.343*</b> | 0.275          | 1       |         |        |         |                |         |        |                |                |        |                |                |               |                |                |     |
| SW  | 0.067  | 0.071  | 0.289*  | -0.022         | 0.410**        | 0.018   | 1       |        |         |                |         |        |                |                |        |                |                |               |                |                |     |
| ST  | -0.095 | -0.106 | 0.060   | -0.008         | 0.240          | 0.059   | -0.029  | 1      |         |                |         |        |                |                |        |                |                |               |                |                |     |
| BT  | 0.038  | -0.117 | 0.350*  | 0.409**        | 0.102          | 0.023   | -0.036  | 0.116  | 1       |                |         |        |                |                |        |                |                |               |                |                |     |
| DCF | 0.117  | -0.047 | 0.178   | 0.472**        | -0.048         | -0.219  | 0.012   | 0.347* | 0.489** | 1              |         |        |                |                |        |                |                |               |                |                |     |
| MCF | 0.073  | 0.005  | 0.148   | -0.116         | <b>0.699**</b> | 0.227   | 0.447** | 0.034  | -0.098  | <b>-0.341*</b> | 1       |        |                |                |        |                |                |               |                |                |     |
| RF  | 0.007  | -0.050 | 0.332*  | 0.057          | 0.158          | 0.240   | 0.281   | 0.361* | 0.161   | 0.299*         | 0.128   | 1      |                |                |        |                |                |               |                |                |     |
| FT  | -0.119 | -0.219 | 0.333*  | -0.090         | 0.488**        | 0.652** | 0.021   | 0.145  | 0.348*  | -0.002         | 0.369** | 0.343* | 1              |                |        |                |                |               |                |                |     |
| SF  | 0.057  | -0.018 | 0.238   | 0.084          | 0.297*         | 0.132   | 0.009   | 0.114  | 0.032   | 0.197          | 0.190   | 0.093  | 0.189          | 1              |        |                |                |               |                |                |     |
| AD  | 0.006  | -0.025 | 0.385** | 0.194          | 0.226          | 0.251   | 0.330*  | -0.032 | 0.471** | 0.106          | 0.221   | 0.313* | 0.373**        | -0.015         | 1      |                |                |               |                |                |     |
| T   | 0.101  | 0.194  | 0.317*  | 0.334*         | 0.063          | -0.051  | 0.100   | 0.110  | 0.188   | 0.189          | 0.056   | -0.110 | -0.155         | 0.353*         | 0.092  | 1              |                |               |                |                |     |
| P   | 0.332* | 0.075  | -0.023  | 0.098          | -0.077         | 0.022   | -0.046  | -0.048 | 0.178   | 0.006          | -0.035  | -0.049 | -0.129         | 0.079          | 0.019  | 0.487**        | 1              |               |                |                |     |
| N   | 0.050  | 0.211  | 0.350*  | 0.043          | 0.321*         | 0.116   | 0.222   | 0.139  | -0.009  | -0.039         | 0.404** | 0.115  | 0.065          | 0.457**        | -0.021 | 0.456**        | 0.317*         | 1             |                |                |     |
| INT | 0.291* | 0.163  | 0.015   | 0.134          | 0.145          | 0.050   | -0.117  | 0.041  | 0.122   | -0.057         | 0.193   | -0.143 | 0.011          | 0.273          | -0.066 | 0.400**        | <b>0.764**</b> | 0.403**       | 1              |                |     |
| D   | 0.276  | 0.089  | 0.207   | 0.298*         | 0.022          | -0.198  | -0.015  | 0.071  | 0.236   | 0.190          | -0.053  | -0.187 | <b>-0.303*</b> | 0.320*         | -0.015 | <b>0.751**</b> | <b>0.606**</b> | 0.404**       | 0.463**        | 1              |     |
| ACT | 0.251  | -0.020 | -0.024  | 0.137          | -0.078         | 0.006   | -0.251  | -0.059 | -0.042  | 0.083          | -0.087  | -0.206 | -0.086         | <b>0.440**</b> | -0.196 | <b>0.380**</b> | <b>0.289*</b>  | <b>0.301*</b> | <b>0.382**</b> | <b>0.366**</b> | 1   |

Abbreviations: BC, Brown Color; OP, Opacity; IR, Icing roughness; DCO, Dark chocolate odor; MCO, Milk chocolate odor; FO, Fat/Cocoa butter odor; SW, Sweet taste; ST, Sour taste; BT, Bitter taste; DCF, Dark chocolate flavor; MCF, Milk chocolate flavor; RF, Raisins flavor; FT, Fat/Cocoa butter /Butter taste; SF, Soft texture; AD, Adhesive texture; T, Tasty; P, Pleasant; N, Natural; INT, Interesting; D, Delightful; ACT, Global acceptance; \* Significant correlation ( $p \leq 0.05$ ). \*\*  $p < 0.01$  Adapted from Olivati, 2020 [17].
